# Supplementary material for: Nuclear myosin VI maintains replication fork stability
Source: PubMed Central journal article supplement (PMC10290672; doi:10.1038/s41467-023-39517-y), 2023-06-24
Supplement: 41467_2023_39517_MOESM3_ESM.pdf [file 41467_2023_39517_MOESM3_ESM.pdf]

## Description of Additional Supplementary Files

File Name: Supplementary Data 1

Description: . A list of all protein groups significantly enriched in the SILAC interactome of GST-tagged MyUb (fold change  $>2$ , FDR  $<0.05$  ), related to figure 1D. Statistics were derived using a two-sided moderated t-test (limma), with BH correction for multiple comparisons.

File Name: Supplementary Data 2

Description: A list of all GO cellular components mapped to proteins from Supplementary Data 1.

File Name: Supplementary Data 3

Description: A list of all GO biological processes mapped to top interactors of GST-tagged MyUb (fold change  $>4$ , FDR  $<0.05$ ), related to Figure 1C. EnrichR statistics were calculated using Fisher's exact test, with BH correction for multiple comparisons.
